# Supplementary material for: Long-term Evolution and Remodeling of Soft Drusen in Rhesus Macaques
Source: PubMed Central journal article supplement — Invest Ophthalmol Vis Sci. 2020 Feb 21;61(2):32. doi: 10.1167/iovs.61.2.32 (PMC7326602; doi:10.1167/iovs.61.2.32), 2020-02-21
Supplement: iovs-61-2-32_s001.pdf [file iovs-61-2-32_s001.pdf]

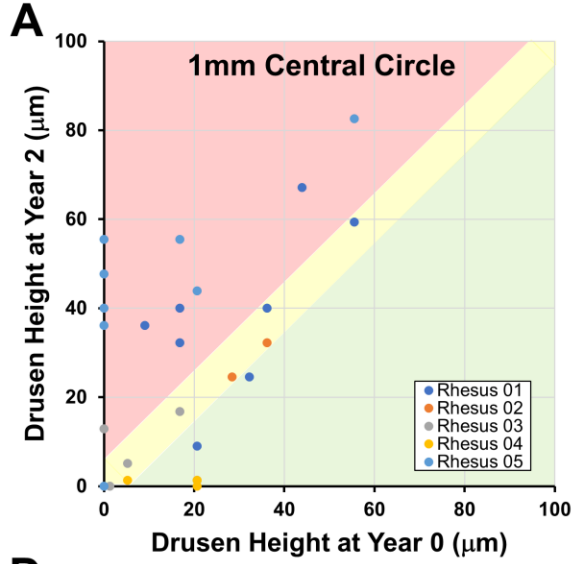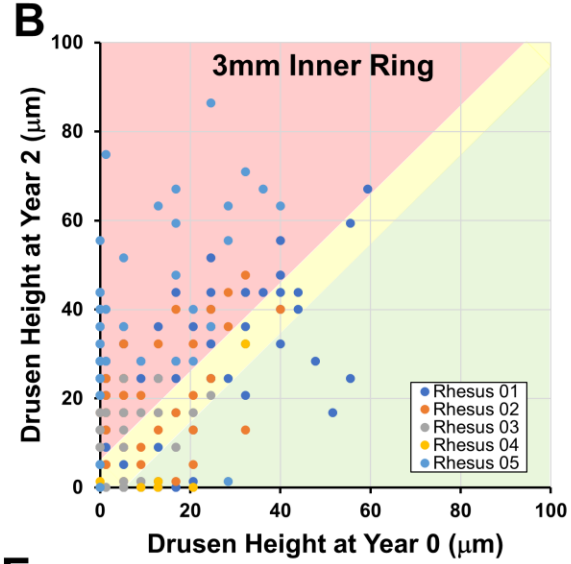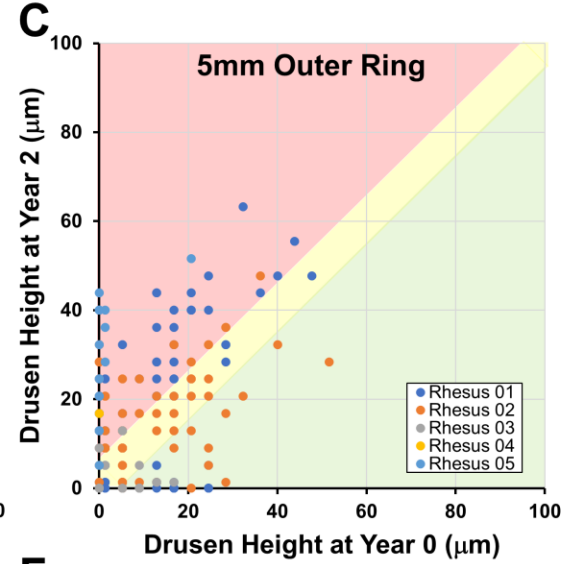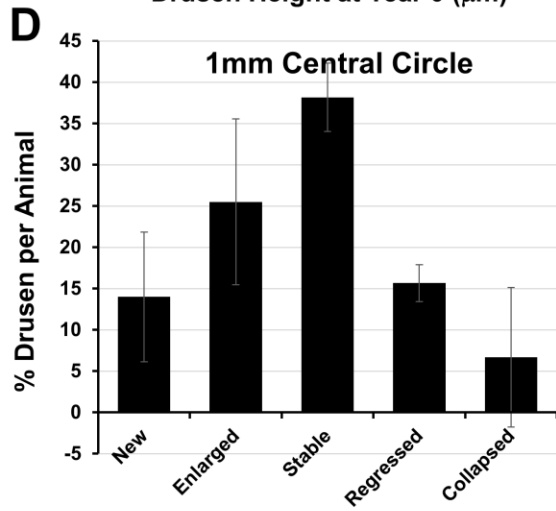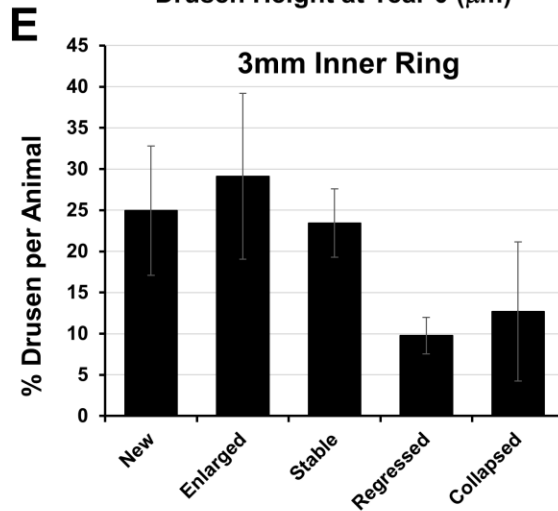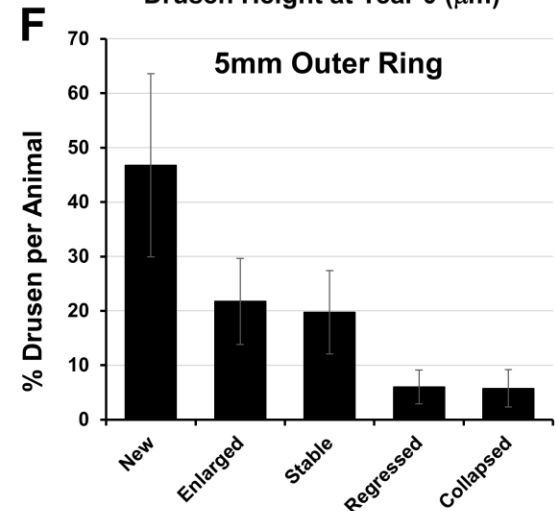

Figure S1. Change in drusen height based on retinal location in Rhesus macaques over 2 years

**(A-C)** Scatterplots showing drusen height at each location for 5 rhesus macaques at years 0 and 2, in the 1mm central circle (A), 3mm inner ring (B), and 5mm outer ring (C). **(D-F)** Bar graphs comparing the proportion of new, enlarged, stable, regressed, and collapsed drusen in animals at these 3 retinal locations. Data are presented as means  $\pm$  SEM. N = 5 animals (10 eyes) per group.
